# Supplementary material for: A Miniaturized Electrostatic Precipitator Respirator Effectively Removes Ambient SARS-CoV-2 Bioaerosols
Source: Viruses. 2022 Apr 6;14(4):765. doi: 10.3390/v14040765 (PMC9025737; doi:10.3390/v14040765)
Supplement: Supplementary file 1 [file viruses-14-00765-s001.zip › viruses-1591691-supplementary.pdf]

Supplementary Materials

# A Miniaturized Electrostatic Precipitator Respirator Effectively Removes Ambient SARS-CoV-2 Bioaerosols

Rachel K. Redmann <sup>1,†</sup>, Brandon J. Beddingfield <sup>1,†</sup>, Skye Spencer <sup>1</sup>, Nicole R. Chirichella <sup>1</sup>, Julian L. Henley <sup>2,3</sup>, Wes Hager <sup>4</sup> and Chad J. Roy <sup>1,5,\*</sup>

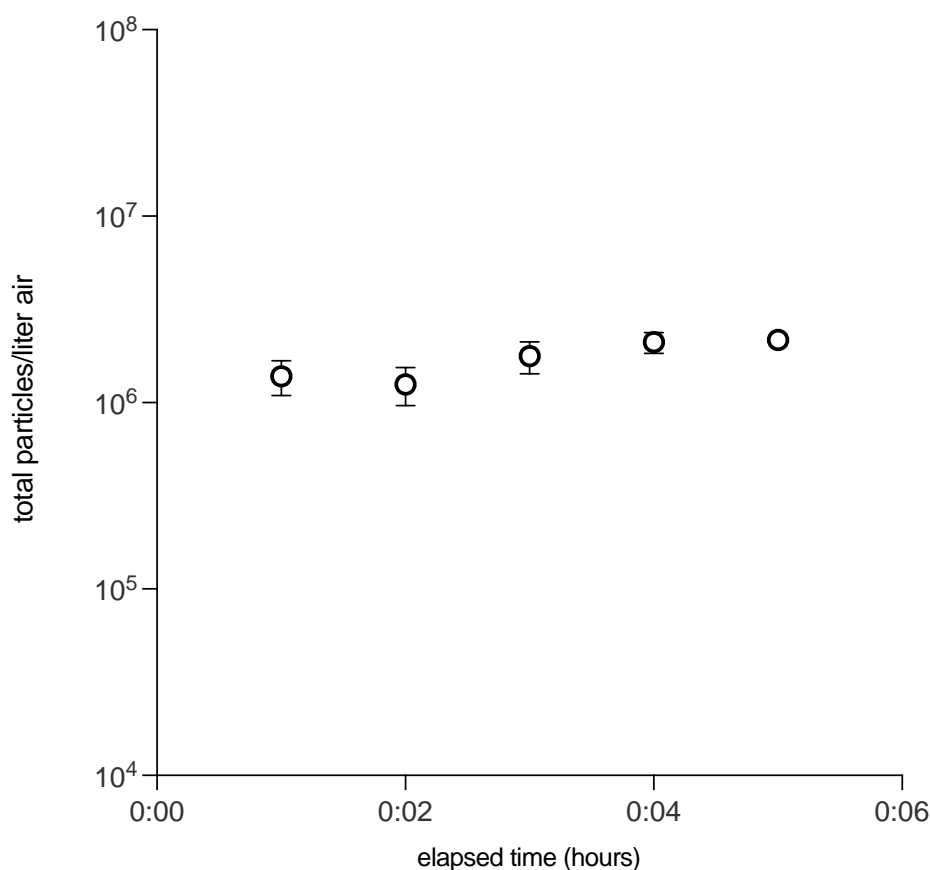

**Figure S1.** Testing system stability. Stability of the respirator exposure system as a function of total particles in the chamber environment on initiation (0:00) and throughout the exposure period. Open circles represent 60-sec average concentrations as measured by particle counter.

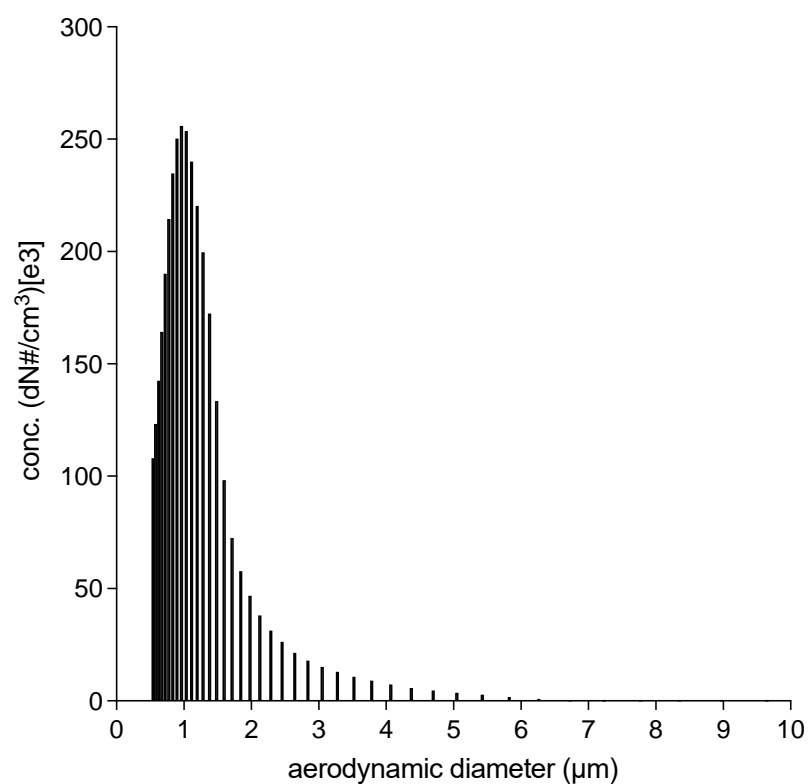

**Figure S2.** Representative particle size distribution in the respirator exposure chamber environment. Results indicated a MMAD of 1.3 μm and geometric standard deviation of 1.4 within the chamber.
